# Supplementary material
Source: Springer Nature journal article supplement (https://www.springermedizin.de/resource/supplementary/12905_2011_276_MOESM1_ESM.pdf/9518384)

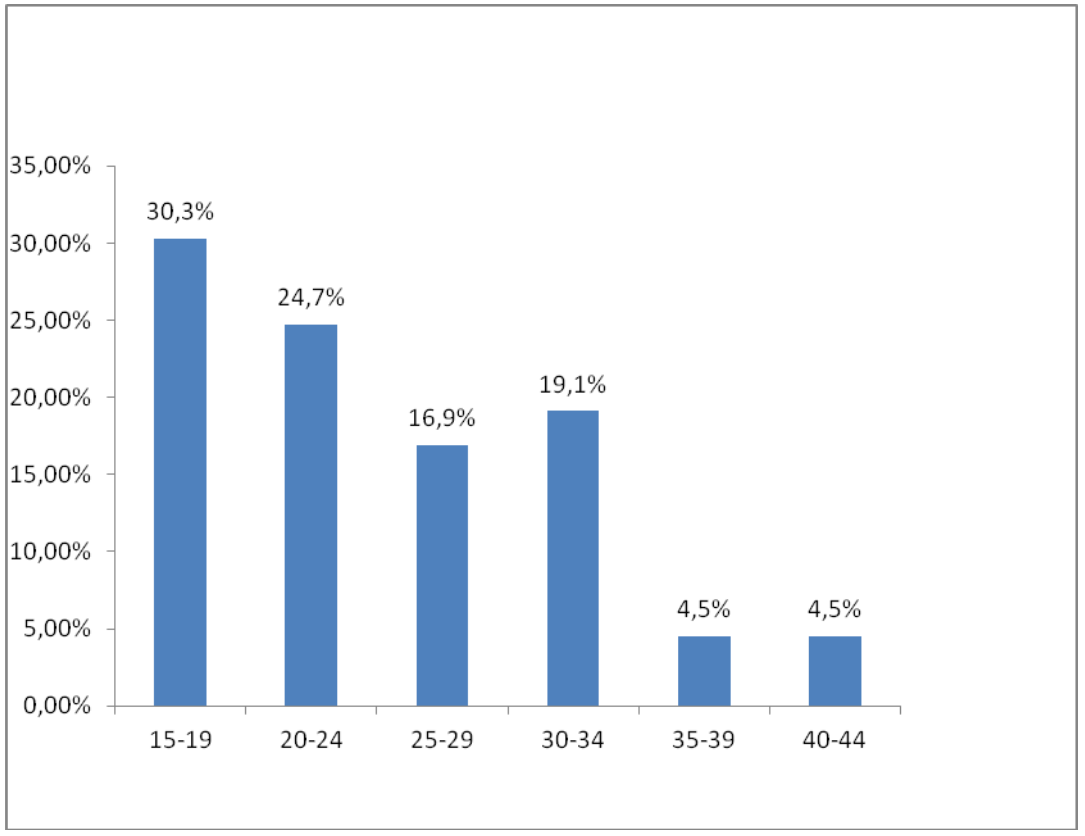

Supplement: MOESM1 [file 9518384]
